# Supplementary material for: Anatomical and Chemical Characterization of Ulmus Species from South Korea
Source: MDPI journal article supplement (doi:10.3390/plants10122617), 2021-11-29
Supplement: s1 [file s1]

Supplementary Data

## **Anatomical and Chemical Characterization of *Ulmus* Species from South Korea**

Woo Sung Park, Hye-Jin Kim, Atif Ali Khan Khalil, Kazi-Marjahan Akter, Dong-Min Kang, Ji-Min Kwon, Yong-ung Kim, Xiang-Lan Piao, Kyung Ah Koo and Mi-Jeong Ahn

**Figure S1.** The EI-MS spectrum of compound **1** (70 eV)

**Figure S2.** The  $^1\text{H}$ -NMR spectrum of compound **1** (300 MHz,  $\text{CD}_3\text{OD}$ )

**Figure S3.** The  $^{13}\text{C}$ -NMR spectrum of compound **1** (125 MHz,  $\text{CD}_3\text{OD}$ )

**Figure S4.** The FAB-MS spectrum of compound **2** (*m*-NBA)

**Figure S5.** The  $^1\text{H}$ -NMR spectrum of compound **2** (300 MHz,  $\text{CD}_3\text{OD}$ )

**Figure S6.** The  $^{13}\text{C}$ -NMR spectrum of compound **2** (125 MHz,  $\text{CD}_3\text{OD}$ )

**Figure S7.** The FAB-MS spectrum of compound **3** (*m*-NBA)

**Figure S8.** The  $^1\text{H}$ -NMR spectrum of compound **3** (500 MHz,  $\text{CD}_3\text{OD}$ )

**Figure S9.** The  $^{13}\text{C}$ -NMR spectrum of compound **3** (125 MHz,  $\text{CD}_3\text{OD}$ )

**Figure S10.** The ESI-MS spectrum of compound **4**

**Figure S11.** The  $^1\text{H}$ -NMR spectrum of compound **4** (500 MHz,  $\text{CD}_3\text{OD}$ )

**Figure S12.** The  $^{13}\text{C}$ -NMR spectrum of compound **4** (125 MHz,  $\text{CD}_3\text{OD}$ )

**Figure S13.** The ESI-MS spectrum of compound **5**

**Figure S14.** The  $^1\text{H}$ -NMR spectrum of compound **5** (500 MHz,  $\text{CD}_3\text{OD}$ )

**Figure S15.** The  $^{13}\text{C}$ -NMR spectrum of compound **5** (125 MHz,  $\text{CD}_3\text{OD}$ )

**Figure S16.** The ESI-MS spectrum of compound **6**

**Figure S17.** The  $^1\text{H}$ -NMR spectrum of compound **6** (500 MHz,  $\text{CD}_3\text{OD}$ )

**Figure S18.** The  $^{13}\text{C}$ -NMR spectrum of compound **6** (125 MHz,  $\text{CD}_3\text{OD}$ )

$^1\text{H}$  and  $^{13}\text{C}$  NMR assign data of isolated compounds

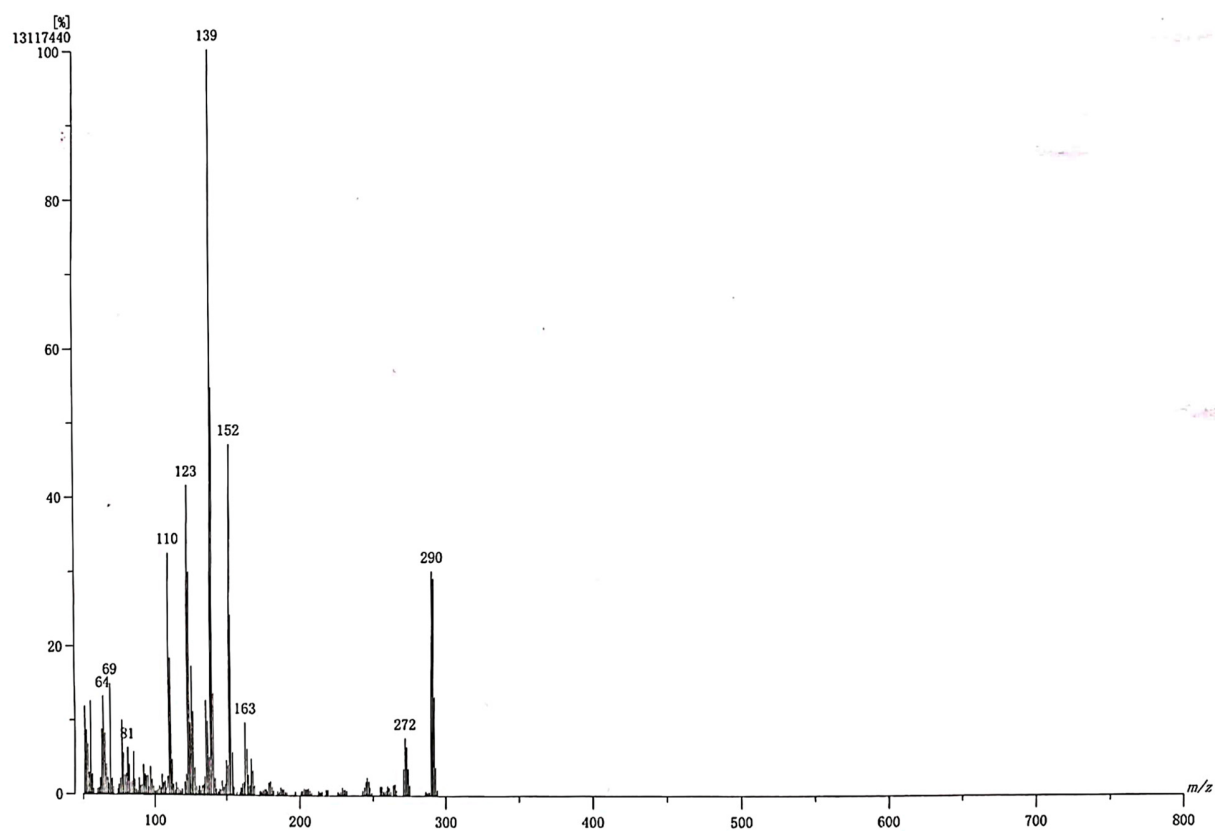

**Figure S1.** The EI-MS spectrum of compound **1** (70 eV)

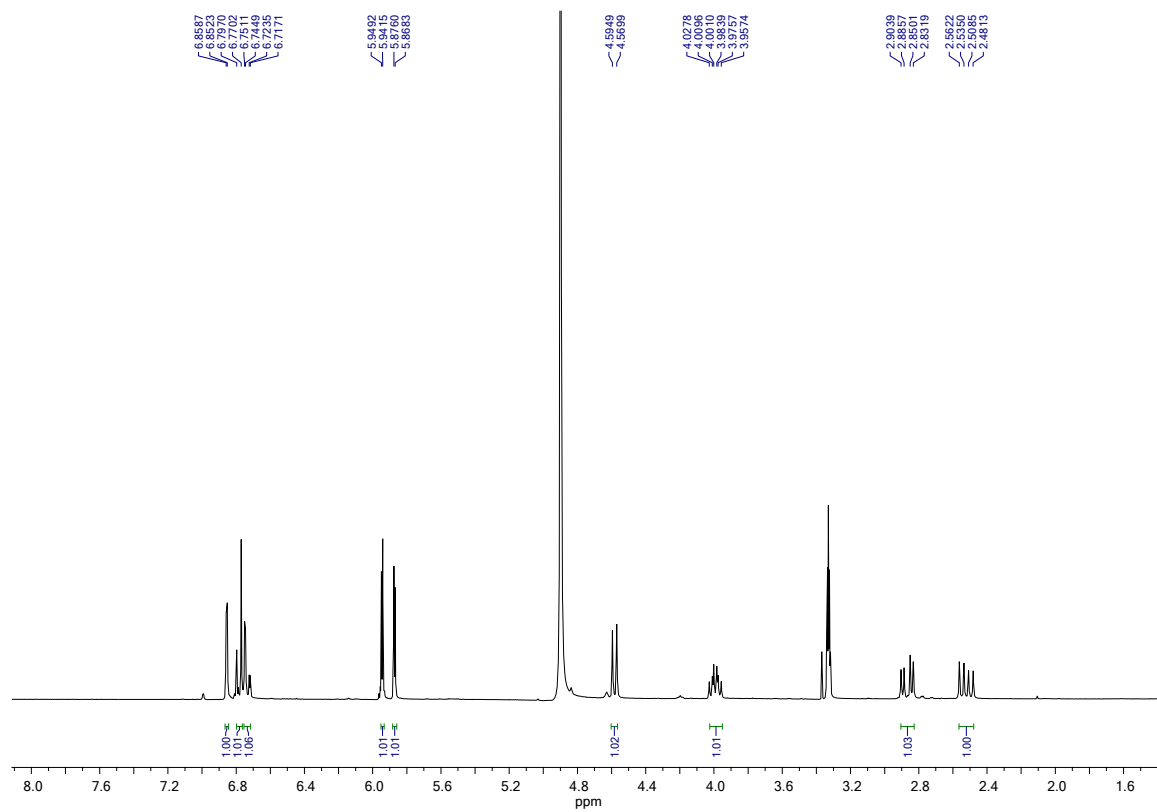

**Figure S2.** The  $^1\text{H}$ -NMR spectrum of compound **1** (300 MHz,  $\text{CD}_3\text{OD}$ )

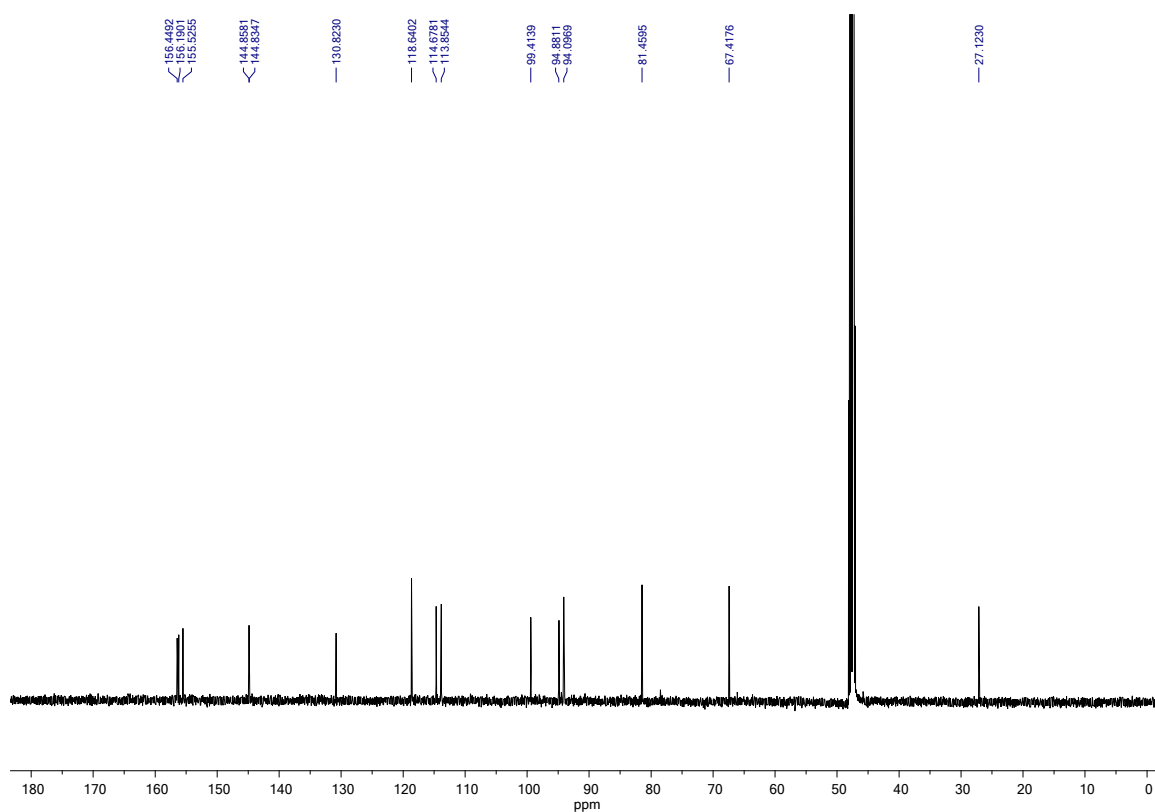

**Figure S3.** The <sup>13</sup>C-NMR spectrum of compound 1 (125 MHz, CD<sub>3</sub>OD)

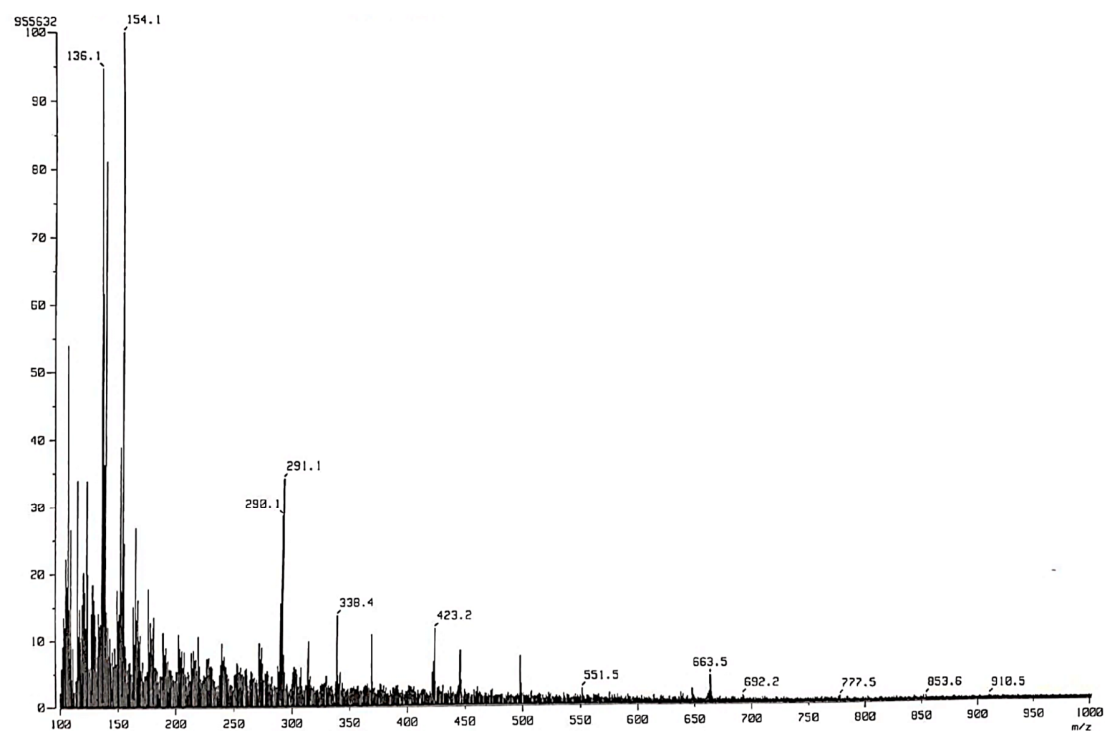

**Figure S4.** The FAB-MS spectrum of compound **2** (*m*-NBA)

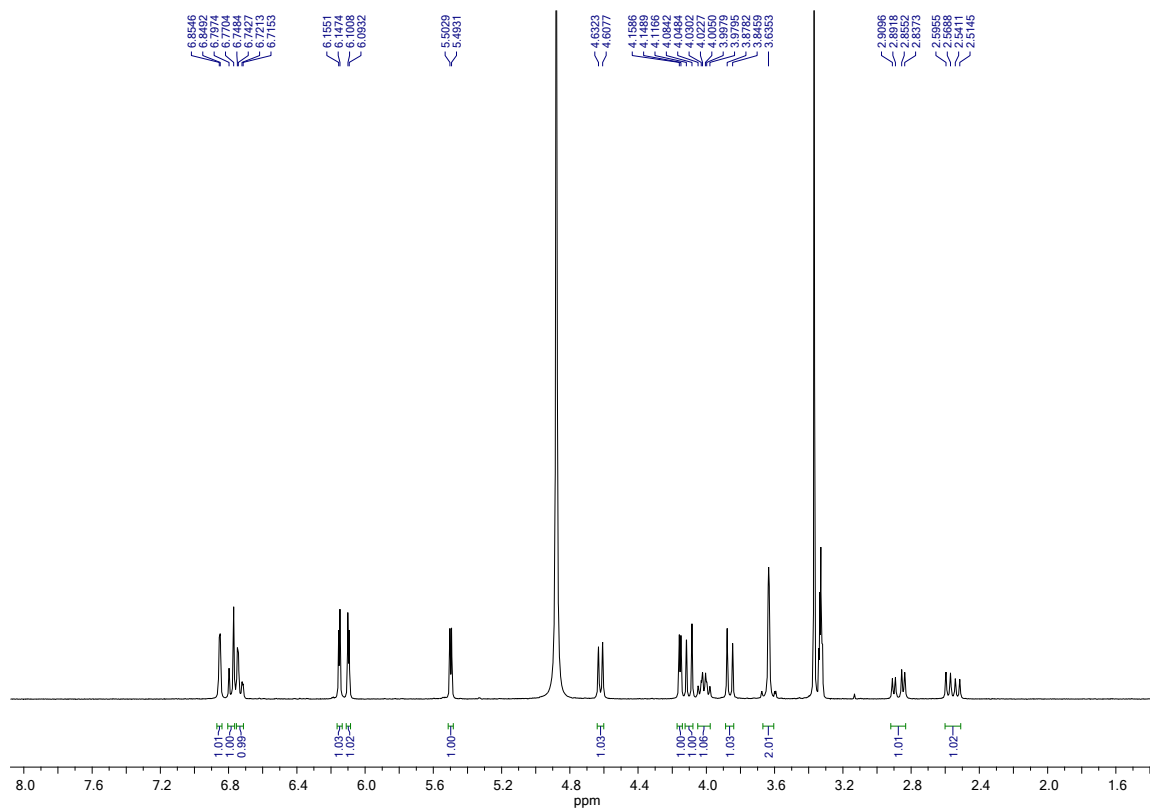

**Figure S5.** The <sup>1</sup>H-NMR spectrum of compound **2** (300 MHz, CD<sub>3</sub>OD)

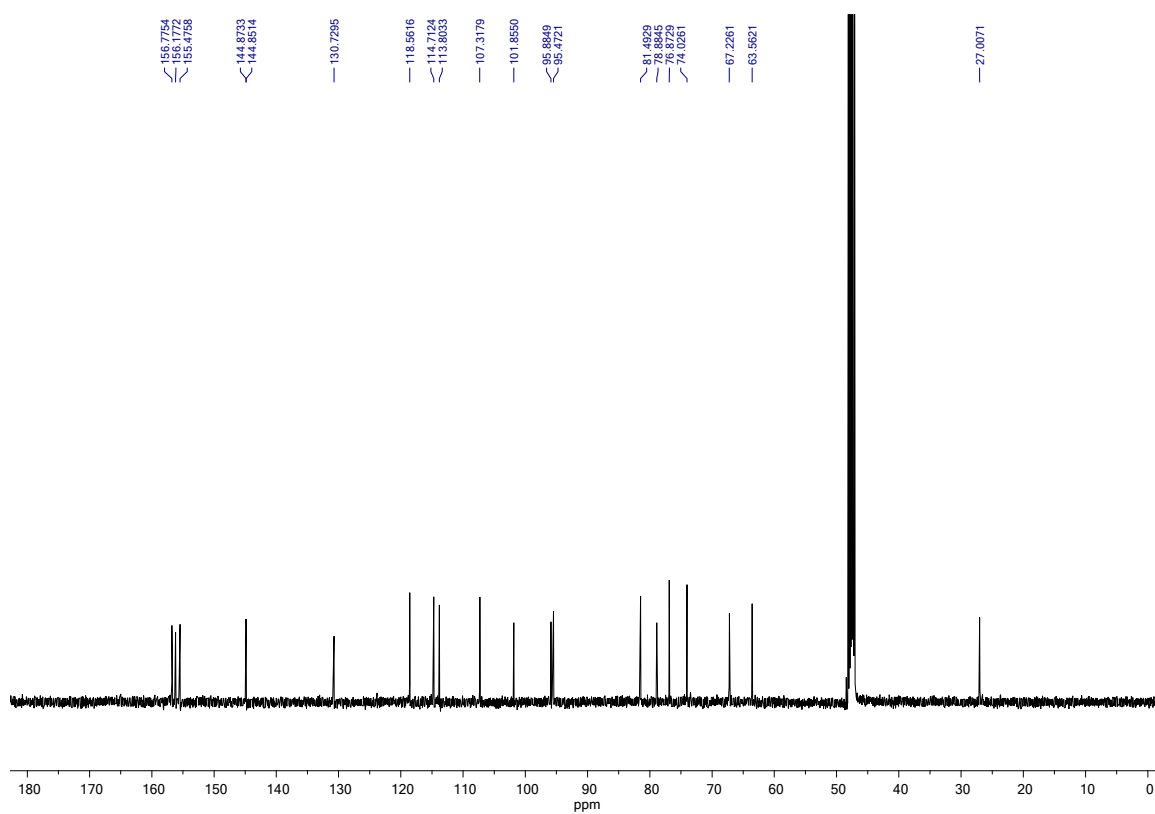

**Figure S6.** The  $^{13}\text{C}$ -NMR spectrum of compound **2** (125 MHz,  $\text{CD}_3\text{OD}$ )



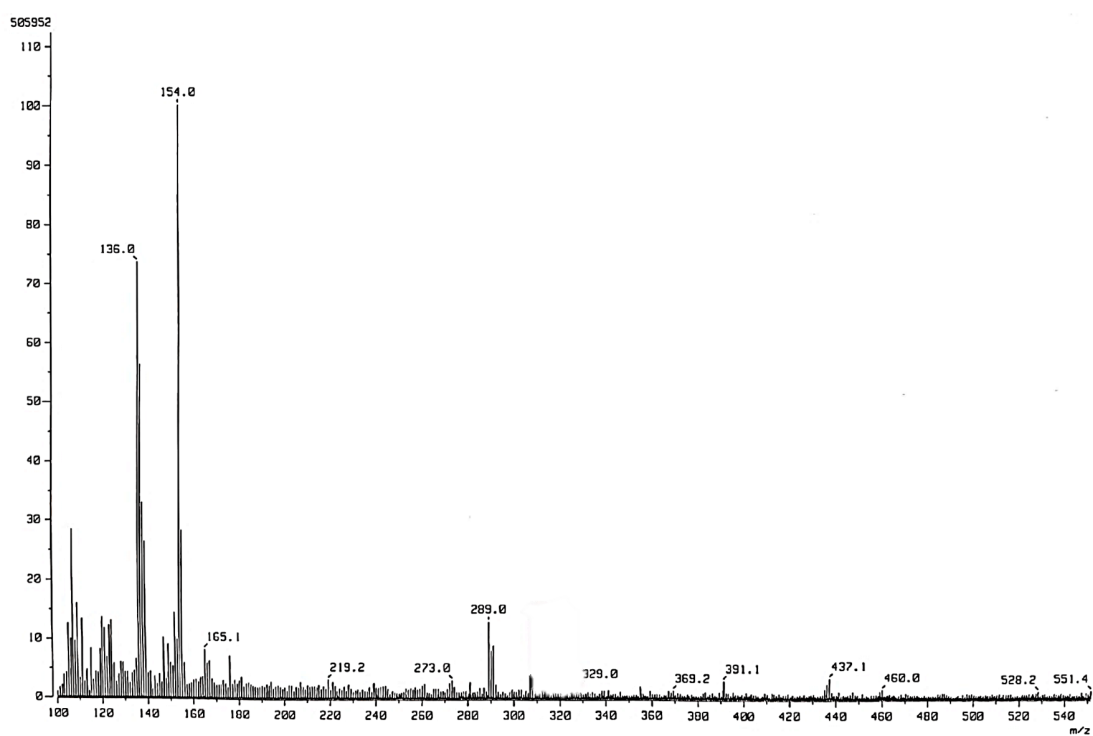

**Figure S7.** The FAB-MS spectrum of compound 3 (*m*-NBA)

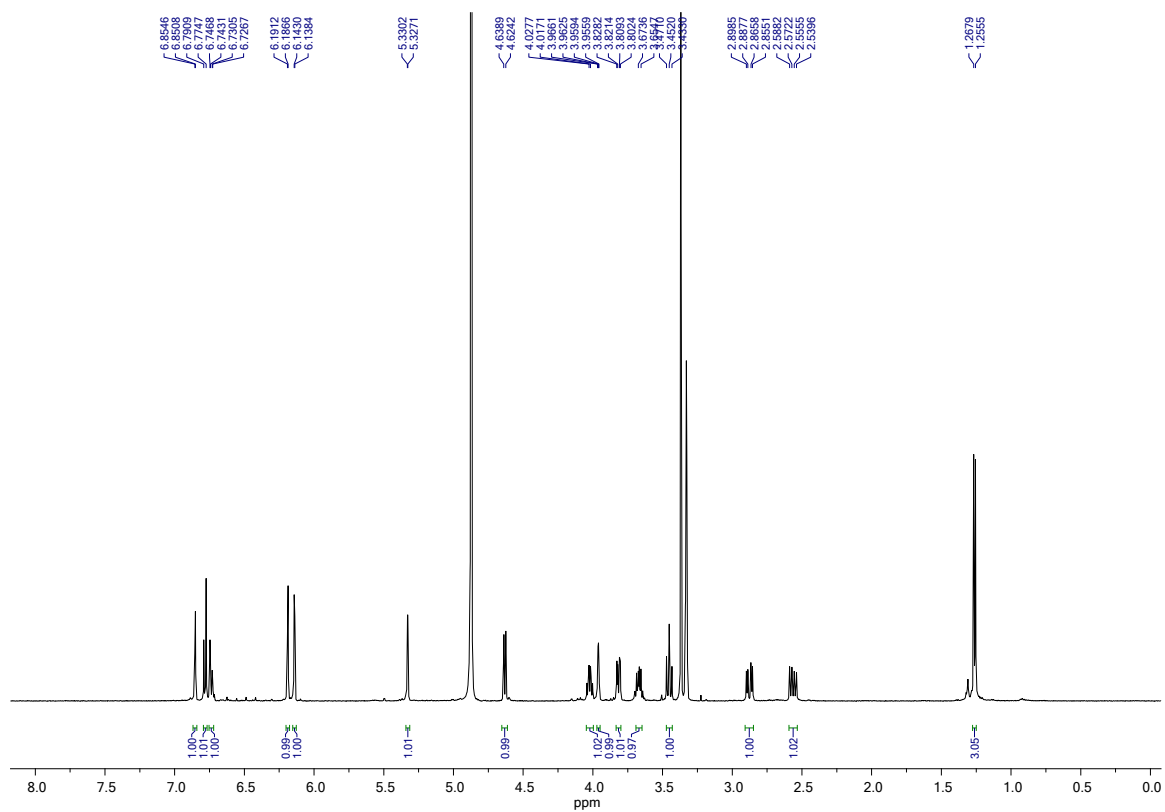

**Figure S8.** The <sup>1</sup>H-NMR spectrum of compound **3** (500 MHz, CD<sub>3</sub>OD)

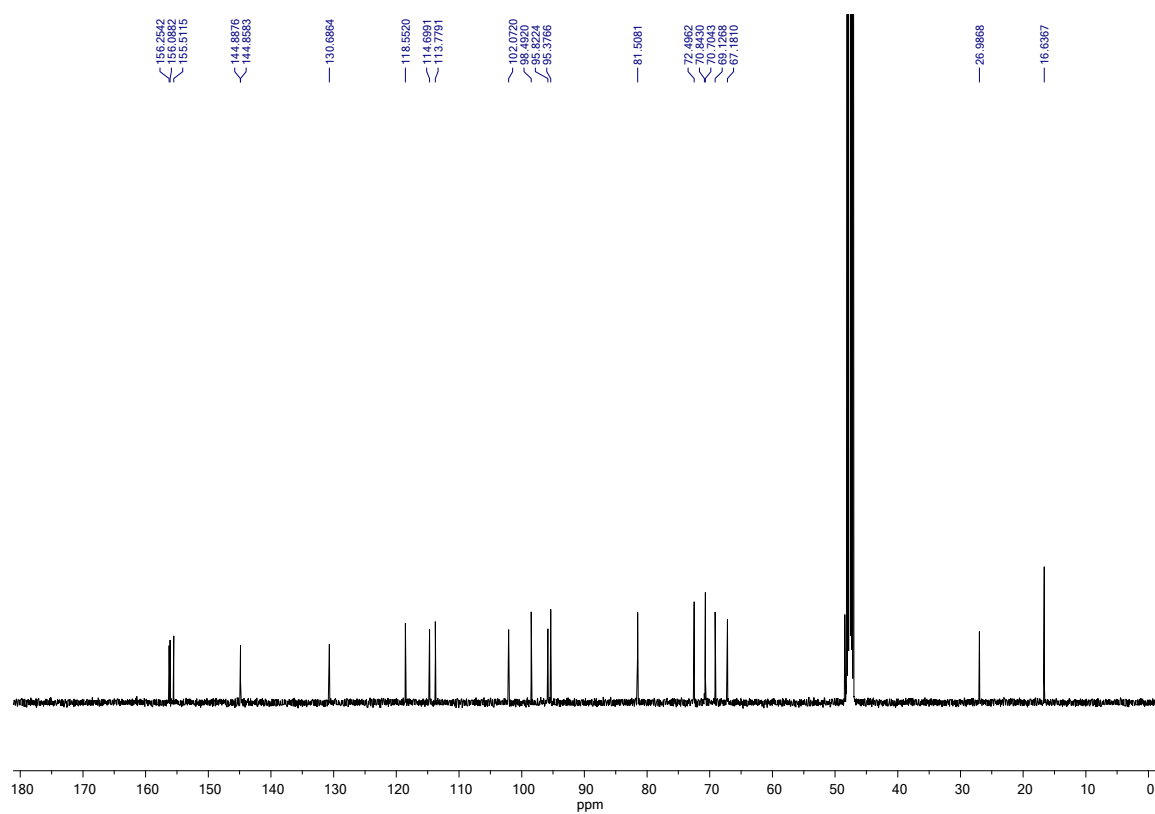

**Figure S9.** The <sup>13</sup>C-NMR spectrum of compound **3** (125 MHz, CD<sub>3</sub>OD)

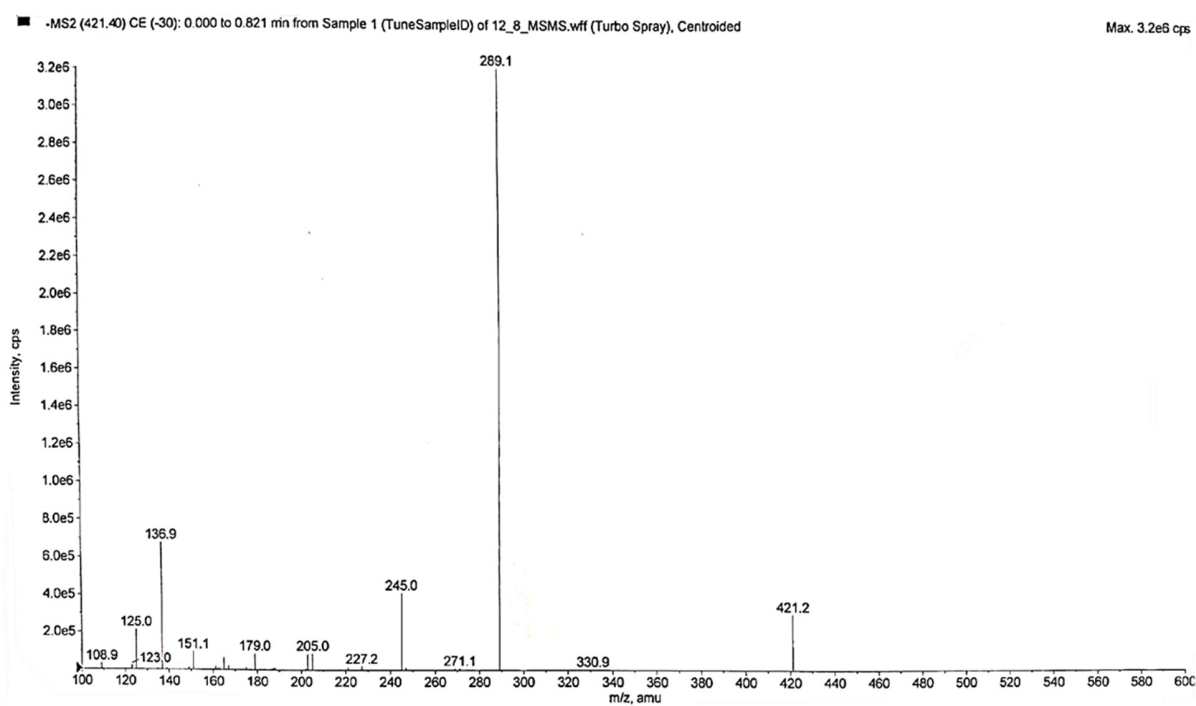

**Figure S10.** The ESI-MS spectrum of compound **4**

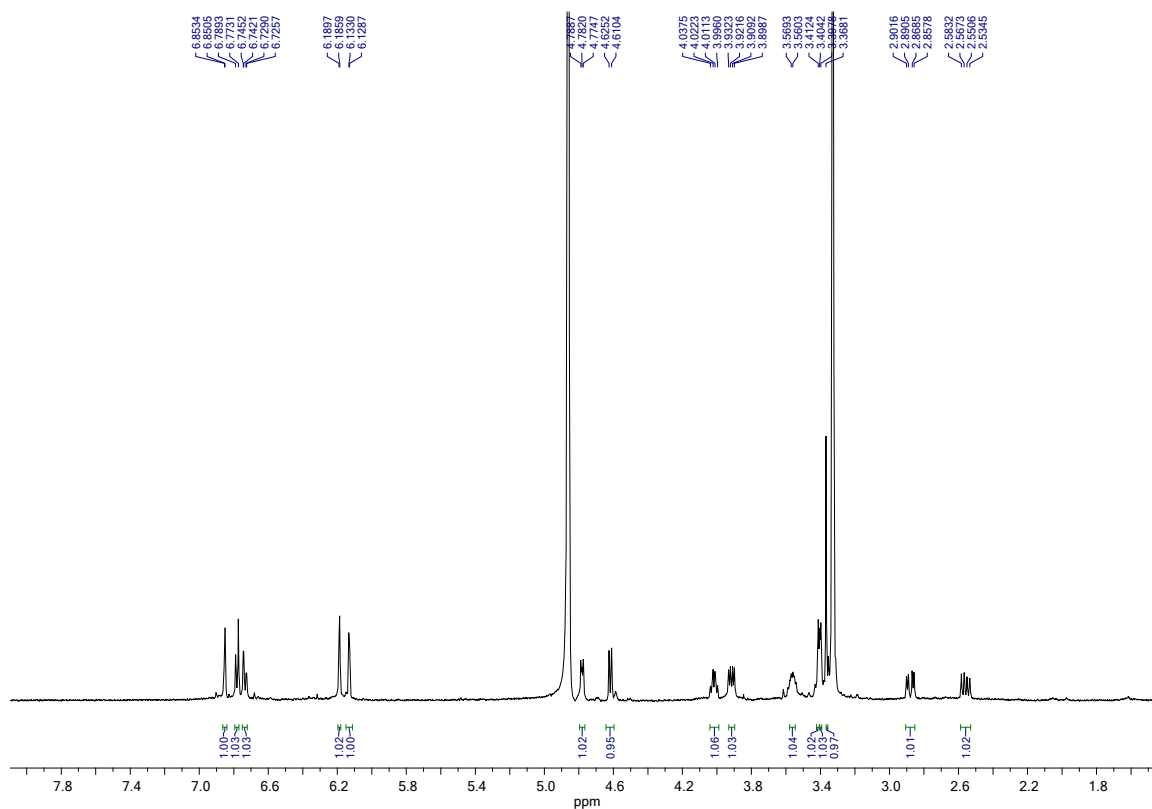

**Figure S11.** The <sup>1</sup>H-NMR spectrum of compound 4 (500 MHz, CD<sub>3</sub>OD)

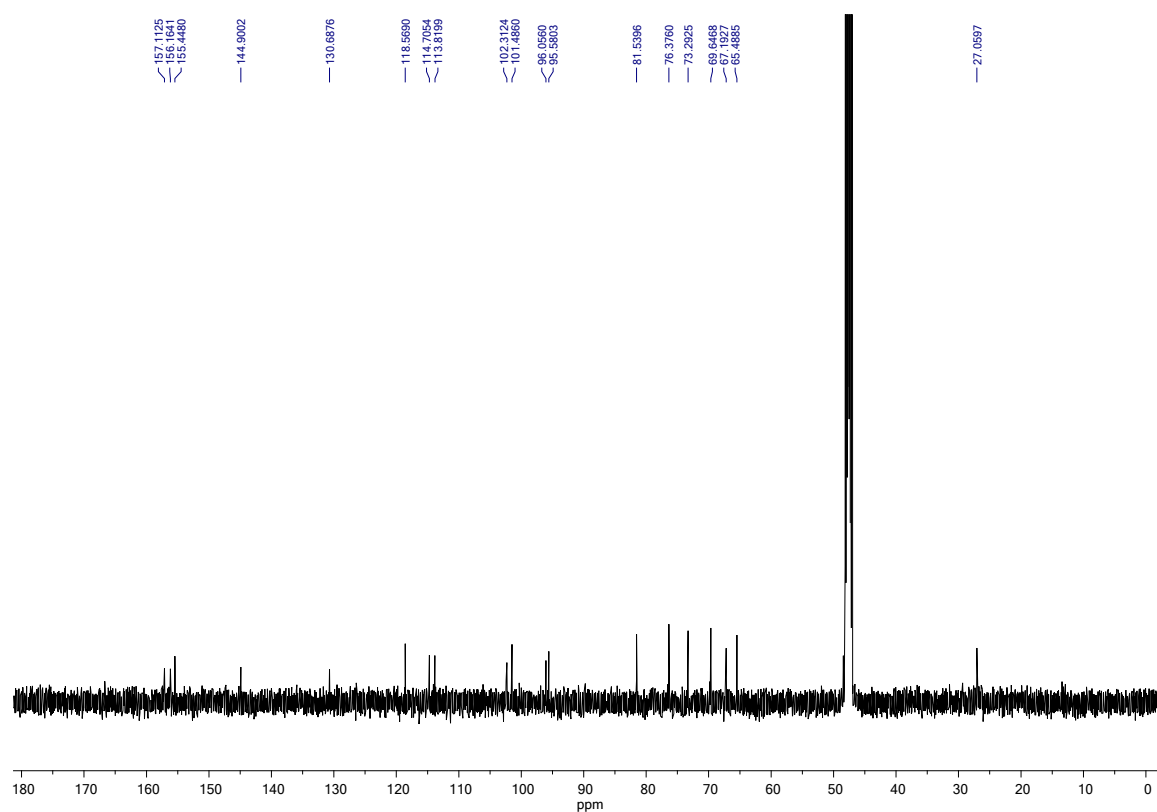

**Figure S12.** The  $^{13}\text{C}$ -NMR spectrum of compound **4** (125 MHz,  $\text{CD}_3\text{OD}$ )

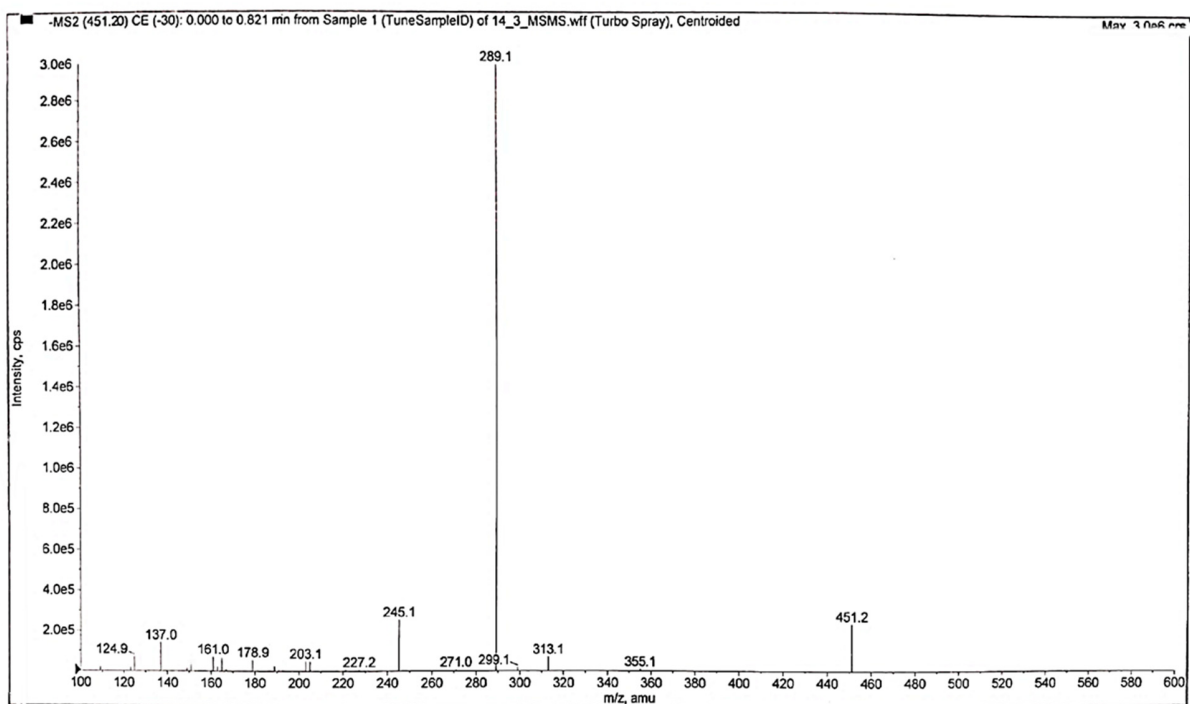

**Figure S13.** The ESI-MS spectrum of compound 5

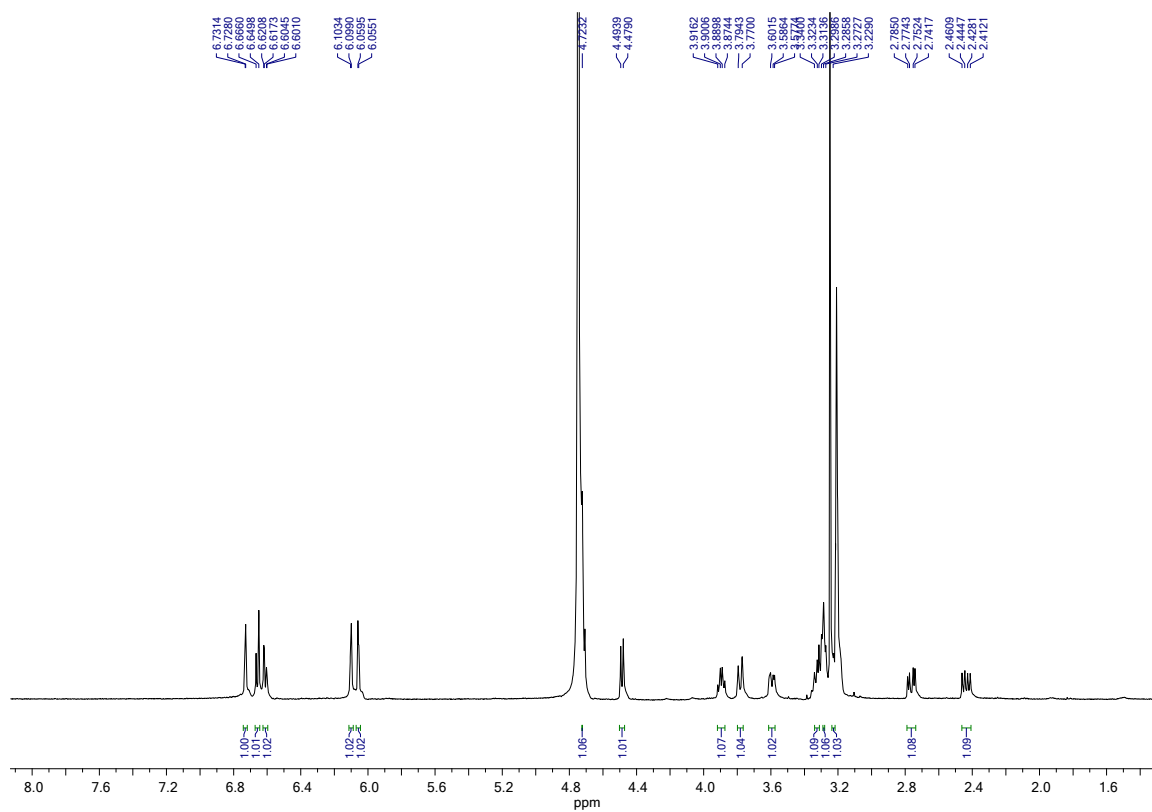

**Figure S14.** The  $^1\text{H}$ -NMR spectrum of compound **5** (500 MHz,  $\text{CD}_3\text{OD}$ )



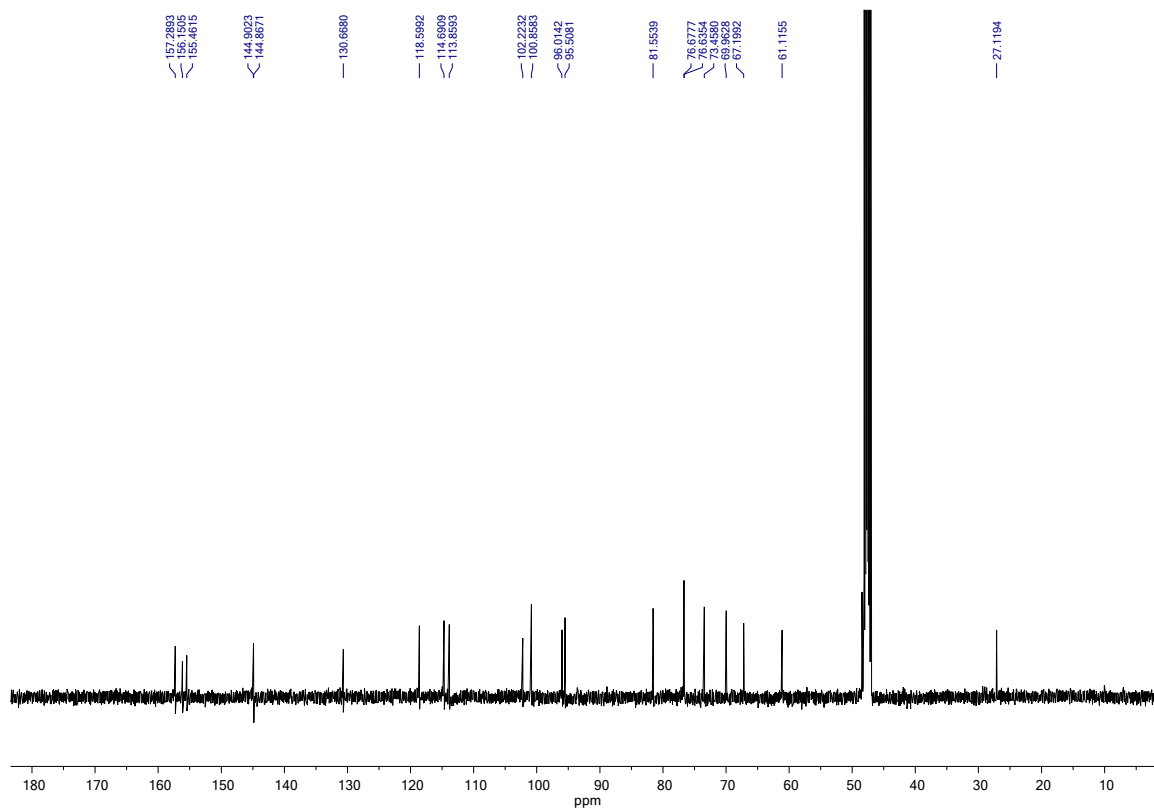

Figure S15. <sup>13</sup>C-NMR spectrum of compound 5 (125 MHz, CD<sub>3</sub>OD)

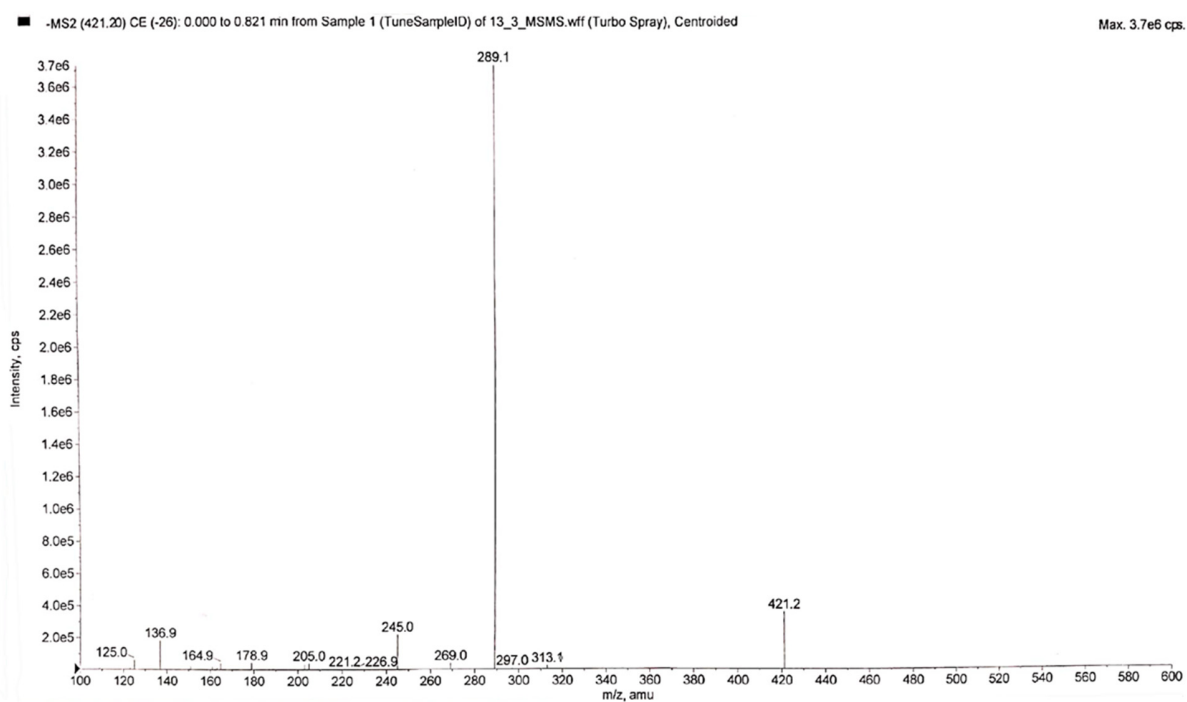

**Figure S16.** The ESI-MS spectrum of compound **6**

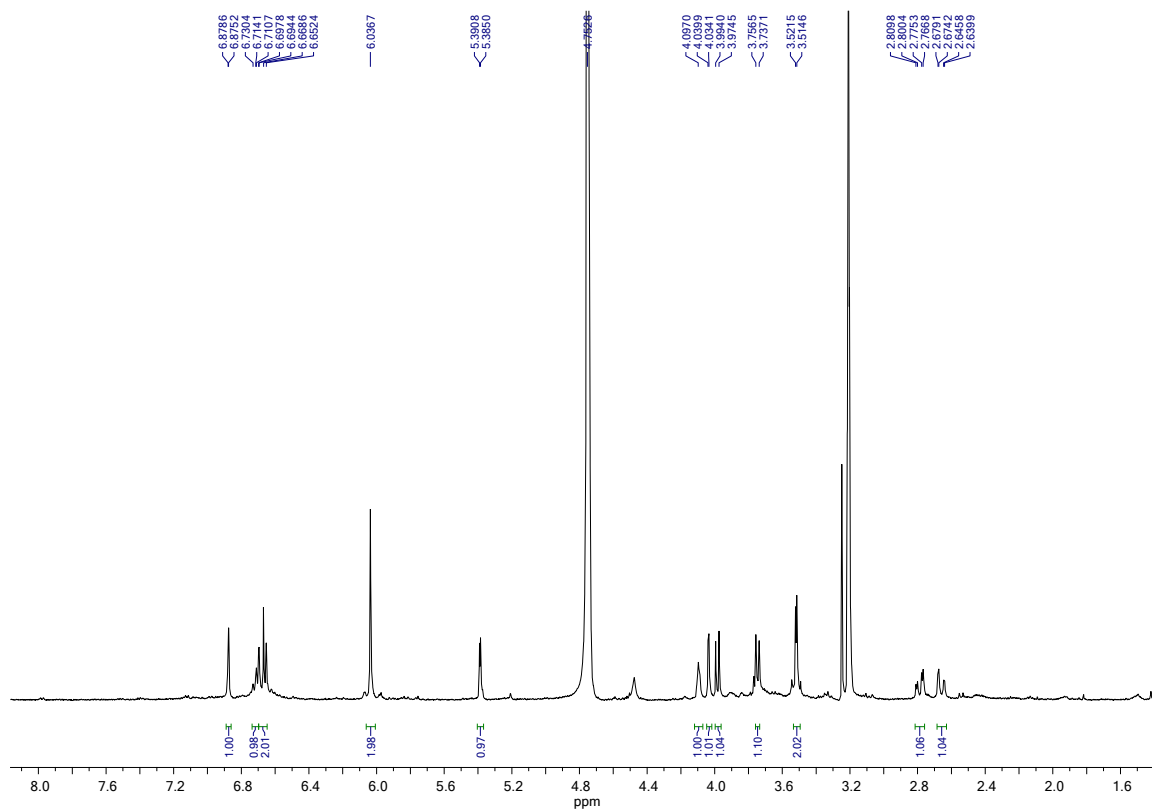

**Figure S17.** The <sup>1</sup>H-NMR spectrum of compound **6** (500 MHz, CD<sub>3</sub>OD)

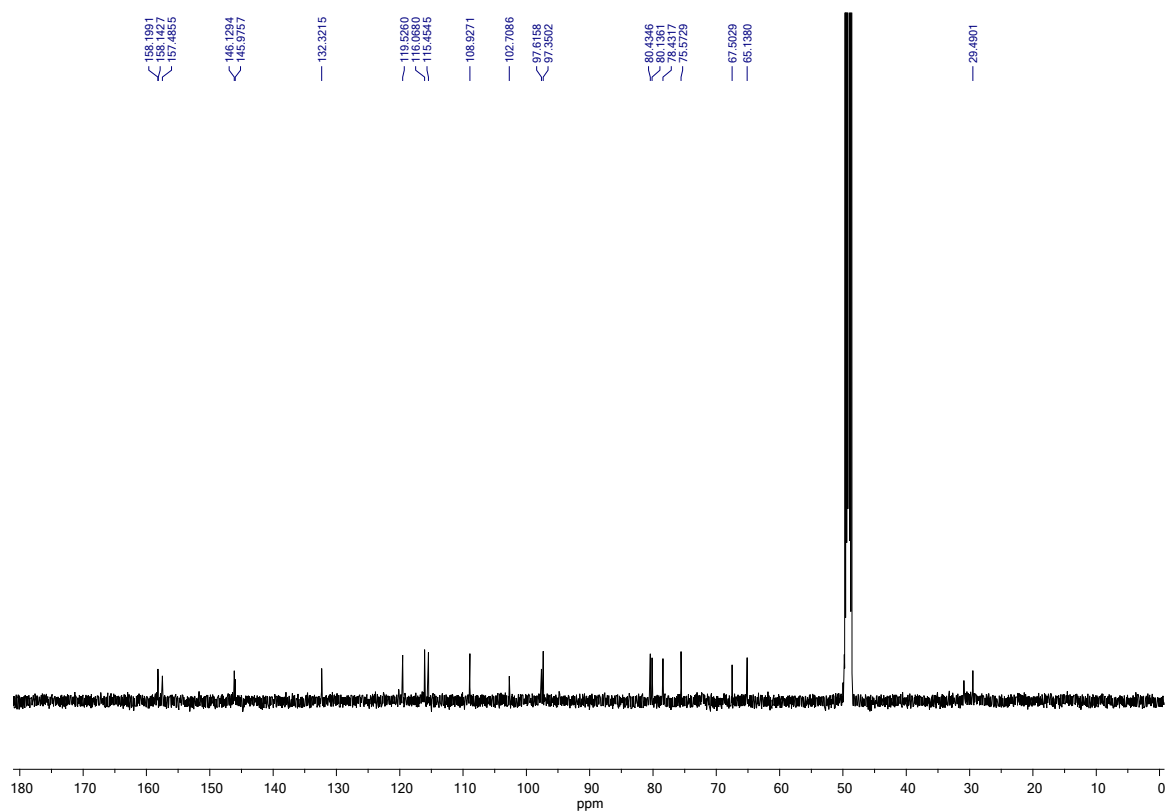

Figure S18. The <sup>13</sup>C-NMR spectrum of compound 6 (125 MHz, CD<sub>3</sub>OD)

## <sup>1</sup>H and <sup>13</sup>C NMR assign data of isolated compounds

**(-)-Catechin (1):** Pale yellow powder; C<sub>15</sub>H<sub>14</sub>O<sub>6</sub>; EI-MS (*m/z*): 290 [M]<sup>+</sup>; <sup>1</sup>H-NMR (CD<sub>3</sub>OD, 300 MHz): δ 6.85 (1H, d, *J* = 1.9 Hz, H-2'), 6.78 (1H, d, *J* = 8.3 Hz, H-5'), 6.73 (1H, dd, *J* = 8.3, 1.9 Hz, H-6'), 5.94 (1H, d, *J* = 2.3 Hz, H-6), 5.87 (1H, d, *J* = 2.3 Hz, H-8), 4.58 (1H, d, *J* = 7.5 Hz, H-2), 4.01 (1H, ddd, *J* = 8.0, 7.5, 5.4 Hz, H-3), 2.87 (1H, dd, *J* = 16.4, 5.4 Hz, H-4eq), 2.55 (1H, dd, *J* = 16.4, 8.0 Hz, H-4ax); <sup>13</sup>C-NMR (CD<sub>3</sub>OD, 125 MHz): δ 156.5 (C-7), 156.2 (C-5), 155.5 (C-9), 144.9 (C-4'), 144.8 (C-3'), 130.8 (C-1'), 118.6 (C-6'), 114.7 (C-5'), 113.9 (C-2'), 99.4 (C-10), 94.9 (C-6), 94.1 (C-8), 81.5 (C-2), 67.4 (C-3), 27.1 (C-4)

**Catechin-7-O-β-D-apiofuranoside (2):** Pale yellow powder; C<sub>20</sub>H<sub>22</sub>O<sub>10</sub>; FAB-MS (*m/z*): 423.2 [M+H]<sup>+</sup>; <sup>1</sup>H-NMR (CD<sub>3</sub>OD, 300 MHz) : δ 6.85 (1H, d, *J* = 1.9 Hz, H-2'), 6.78 (1H, d, *J* = 8.3 Hz, H-5'), 6.73 (1H, dd, *J* = 8.3, 1.9 Hz, H-6'), 6.15 (1H, d, *J* = 3.4 Hz, H-6), 6.10 (1H, d, *J* = 3.4 Hz, H-8), 5.50 (1H, d, *J* = 3.0 Hz, H-1''), 4.62 (1H, d, *J* = 7.4 Hz, H-2), 4.15 (1H, d, *J* = 3.0 Hz, H-2''), 4.10 (1H, d, *J* = 9.7 Hz, H-4''a), 4.01 (1H, ddd, *J* = 8.0, 7.4, 5.4 Hz, H-3), 3.86 (1H, d, *J* = 9.7 Hz, H-4''b), 3.65 (1H, d, *J* = 11.5 Hz, H-5''a), 3.61 (1H, d, *J* = 11.5 Hz, H-5''b), 2.87 (1H, dd, *J* = 16.4, 5.4 Hz, H-4eq), 2.55 (1H, dd, *J* = 16.4, 8.0 Hz, H-4ax); <sup>13</sup>C-NMR (CD<sub>3</sub>OD, 125 MHz) : δ 156.8 (C-7), 156.2 (C-5), 155.5 (C-9), 144.9 (C-3', 4'), 130.7 (C-1'), 118.6 (C-6'), 114.7 (C-5'), 113.8 (C-2'), 107.3 (C-1''), 101.8 (C-10), 95.9 (C-6), 95.4 (C-8), 81.5 (C-2), 78.9 (C-3''), 76.9 (C-2''), 74.0 (C-4''), 67.2 (C-3), 63.5 (C-5''), 27.0 (C-4)

**Catechin-7-O-α-L-rhamnopyranoside (3):** Pale yellow powder; C<sub>21</sub>H<sub>24</sub>O<sub>10</sub>; FAB-MS (*m/z*): 437.1 [M+H]<sup>+</sup>; <sup>1</sup>H-NMR (CD<sub>3</sub>OD, 500 MHz) : δ 6.85 (1H, d, *J* = 1.9 Hz, H-2'), 6.78 (1H, d, *J* = 8.2 Hz, H-5'), 6.73 (1H, dd, *J* = 8.2, 1.9 Hz, H-6'), 6.19 (1H, d, *J* = 2.3 Hz, H-8), 6.14 (1H, d, *J* = 2.3 Hz, H-6), 5.33 (1H, d, *J* = 1.5 Hz, H-1''), 4.63 (1H, d, *J* = 7.3 Hz, H-2), 4.01 (1H, ddd, *J* = 8.6, 7.3, 5.3 Hz, H-3), 3.96 (1H, d, *J* = 1.5 Hz, H-2''), 3.82 (1H, dd, *J* = 9.4, 6.1 Hz, H-3''), 3.66 (1H, m, H-4''), 3.45 (1H, t, *J* = 9.5 Hz, H-5''), 2.88 (1H, dd, *J* = 16.4, 5.3 Hz, H-4eq), 2.56 (1H, dd, *J* = 16.4, 8.6 Hz, H-4ax), 1.26 (3H, *J* = 6.3 Hz, 5''-CH<sub>3</sub>); <sup>13</sup>C-NMR (CD<sub>3</sub>OD, 125 MHz) : δ 156.5 (C-7), 156.1 (C-5), 155.5 (C-9), 144.9 (C-3', 4'), 130.7 (C-1'), 118.6 (C-6'), 114.7 (C-5'), 113.8 (C-2'), 102.1 (C-10), 98.5 (C-1''), 95.8 (C-6), 95.4 (C-8), 81.5 (C-2), 72.5 (C-5''), 70.9 (C-3''), 70.7 (C-2''), 69.1 (C-4''), 67.2 (C-3), 27.0 (C-4), 16.6 (5''-CH<sub>3</sub>)

**Catechin-7-O-β-D-xylopyranoside (4):** Pale yellow powder; C<sub>20</sub>H<sub>22</sub>O<sub>10</sub>; ESI-MS (*m/z*): 421.2 [M-H]<sup>-</sup>; <sup>1</sup>H-NMR (CD<sub>3</sub>OD, 500 MHz) : δ 6.85 (1H, d, *J* = 1.5 Hz, H-2'), 6.78 (1H, d, *J* = 8.0 Hz, H-5'), 6.73 (1H, dd, *J* = 8.0, 1.5 Hz, H-6'), 6.19 (1H, d, *J* = 2.1 Hz, H-8), 6.13 (1H, d, *J* = 2.1 Hz, H-6), 4.78 (1H, d, *J* = 7.0 Hz, H-1''), 4.62 (1H, d, *J* = 7.4 Hz, H-2), 4.01 (1H, ddd, *J* = 8.0, 7.4, 5.6 Hz, H-3), 3.92 (1H, dd, *J* = 6.2, 5.4 Hz, H-5''a), 3.57 (1H, m, H-4''), 3.41 (1H, m, H-3''), 3.40 (1H, m, H-2''), 3.36 (1H, m, H-5''b), 2.88 (1H, dd, *J* = 16.6, 5.6 Hz, H-4eq), 2.56 (1H, dd, *J* = 16.6, 8.0 Hz, H-4ax); <sup>13</sup>C-NMR (CD<sub>3</sub>OD, 125 MHz) : δ 157.1 (C-7), 156.1 (C-5), 155.5 (C-9), 144.9 (C-3', 4'), 130.7 (C-1'), 118.6 (C-6'), 114.7 (C-5'), 113.8 (C-2'), 102.3 (C-10), 101.5 (C-1''), 96.1 (C-6), 95.6 (C-8), 81.5 (C-2), 76.4 (C-3''), 73.3 (C-2''), 69.7 (C-4''), 65.5 (C-3), 65.5 (C-5''), 27.1 (C-4)

**Catechin-7-O-β-D-glucopyranoside (5):** Pale yellow powder; C<sub>21</sub>H<sub>24</sub>O<sub>11</sub>; ESI-MS (*m/z*): 451.2 [M-H]<sup>-</sup>; <sup>1</sup>H-NMR (CD<sub>3</sub>OD, 500 MHz) : δ 6.73 (1H, d, *J* = 1.3 Hz, H-2'), 6.66 (1H, d, *J* = 8.1 Hz, H-5'), 6.61 (1H, dd, *J* = 8.1, 1.3 Hz, H-6'), 6.10 (1H, d, *J* = 2.2 Hz, H-6), 6.06 (1H, d, *J* = 2.2 Hz, H-8), 4.72 (1H, d, *J* = 7.9 Hz, H-1''), 4.49 (1H, d, *J* = 7.5 Hz, H-2), 3.90 (1H, ddd, *J* = 8.0, 7.9, 5.4 Hz, H-3), 3.78 (1H, d, *J* = 12.0 Hz, H-6''b), 3.59 (1H, dd, *J* = 12.0, 5.5 Hz, H-6''a), 3.32 (1H, m, H-3''), 3.29 (1H, m, H-2''), 3.23 (1H, m, H-4''), 2.76 (1H, dd, *J* = 16.3, 5.4 Hz, H-4eq), 2.44 (1H, dd, *J* = 16.3, 8.0 Hz, H-4ax); <sup>13</sup>C-NMR (CD<sub>3</sub>OD, 125 MHz) : δ 157.3 (C-7), 156.2 (C-5), 155.5 (C-9), 144.9 (C-3', 4'), 130.7 (C-1'), 118.6 (C-6'), 114.7 (C-5'), 113.9 (C-2'), 102.2 (C-10), 100.9 (C-1''), 96.0 (C-6), 95.5 (C-8), 81.6 (C-2), 76.7 (C-3'', 5''), 73.5 (C-2''), 70.0 (C-4''), 67.4 (C-3), 61.1 (C-6''), 27.1 (C-4)

**Catechin-5-*O*- $\beta$ -D-apiofuranoside (6):** pale yellowish powder; C<sub>22</sub>H<sub>22</sub>O<sub>11</sub>; ESI-MS (*m/z*): 421.2 [M-H]<sup>-</sup>; <sup>1</sup>H-NMR (CD<sub>3</sub>OD, 500 MHz) :  $\delta$  6.88 (1H, d, *J* = 1.7 Hz, H-2'), 6.70 (1H, d, *J* = 8.1, 1.7 Hz, H-6'), 6.66 (1H, dd, *J* = 8.1 Hz, H-5'), 6.04 (2H, s, H-6, 8), 5.39 (1H, d, *J* = 2.9 Hz, H-1''), 4.75 (1H, br s, H-2), 4.10 (1H, m, H-3), 4.04 (1H, d, *J* = 3.0 Hz, H-2''), 3.98 (1H, d, *J* = 9.7 Hz, H-4''a), 3.75 (1H, d, *J* = 9.7 Hz, H-4''b), 3.53 (1H, d, *J* = 11.4 Hz, H-5''a), 3.50 (1H, d, *J* = 11.4 Hz, H-5''b), 2.79 (1H, dd, *J* = 16.7, 4.7 Hz, H-4eq), 2.68 (1H, dd, *J* = 16.7, 2.5 Hz, H-4ax); <sup>13</sup>C-NMR (CD<sub>3</sub>OD, 125 MHz) :  $\delta$  158.2 (C-5, 9), 157.5 (C-7), 146.1 (C-4'), 146.0 (C-3'), 132.3 (C-1'), 119.5 (C-6'), 116.1 (C-5'), 115.5 (C-2'), 108.9 (C-1''), 102.7 (C-10), 97.6 (C-6), 97.4 (C-8), 80.4 (C-2), 80.1 (C-3''), 78.4 (C-2''), 75.6 (C-4''), 67.5 (C-3), 65.1 (C-5''), 29.5 (C-4)
